# Supplementary material for: Effect of annealing on the defect-mediated blue phosphorescence in ZnO nanocrystals
Source: Royal Society of Chemistry journal article supplement (doi:10.1039/d0ra04766j), 2020-12-23

## Effect of Annealing on the Defect-mediated Blue Phosphorescence in ZnO Nanocrystals

Sagnik Das<sup>a</sup>, Uttam Kumar Ghorai<sup>b</sup>, Rajib Dey<sup>c</sup>, Chandan Kumar Ghosh<sup>c</sup>, Mrinal Pal<sup>a\*</sup>

---

### Electronic Supplementary Information

**ESI-Table-1:** Raman peaks of BZ150, BZ350, BZ450, BZ550, BZ650, BZ750, BZ850.

| Sample | E2(low) | 2E2(low) | A1(TO) | E2(high) | E1(LO) | Peak6 | E2(LO) |
|--------|---------|----------|--------|----------|--------|-------|--------|
| BZ150  | 106     | 208      | 389    | 442      | 586    | 1058  | 1142   |
| BZ350  | 104.6   | 210      | 387    | 442      | 588    | 1052  | 1152   |
| BZ450  | 102     | 205      | 390    | 445      | 589    | 1056  | 1155   |
| BZ550  | 104     | 204      | 387    | 443      | 589    | 1055  | 1154   |
| BZ650  | 95      | 221      | 392    | 451      | 588    | ----- | 1163   |
| BZ750  | 103     | 214      | 387    | 444      | 590    | ----- | 1156   |
| BZ850  | 109     | 210      | 394    | 445      | 591    | ----- | 1156   |

**ESI-Fig. I:** EDX spectra of (A) BZ150, (B1) BZ550-Ar, (B2) BZ550, (B3) BZ550-O2, (C) BZ850R.

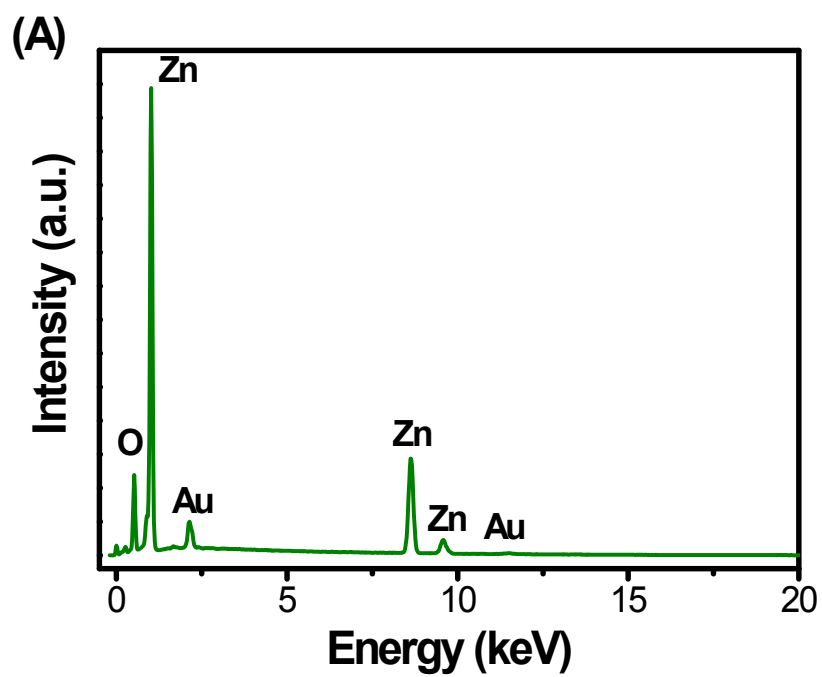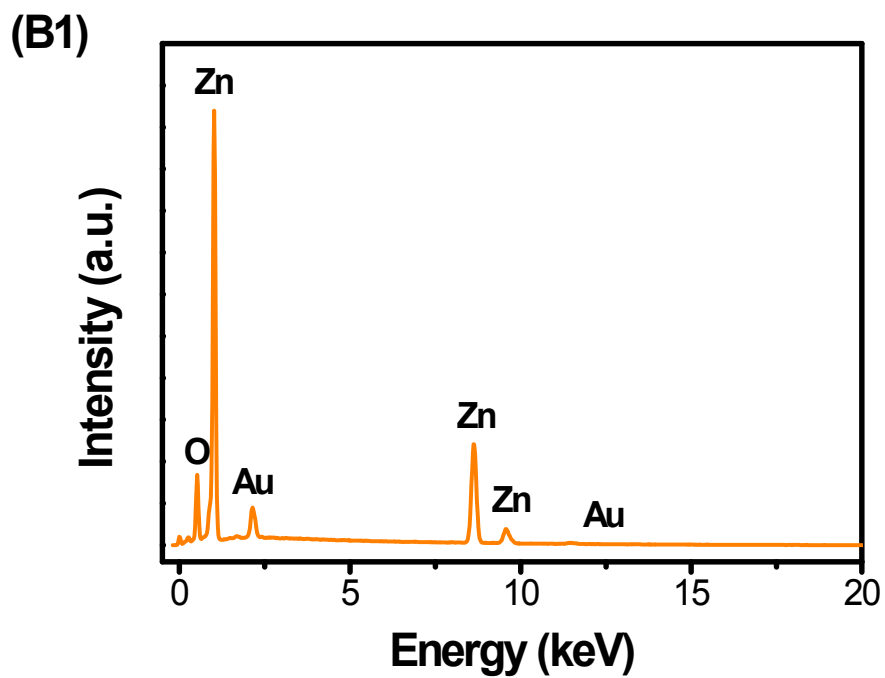

(B2)

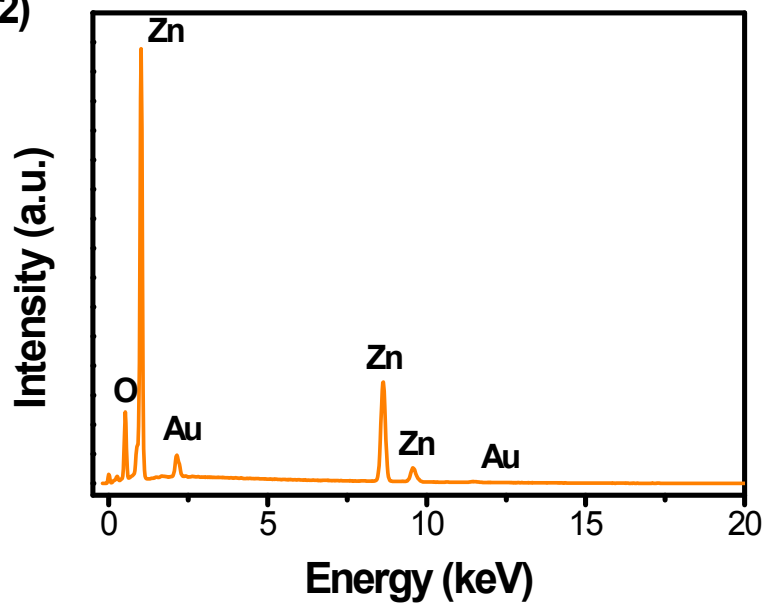

(B3)

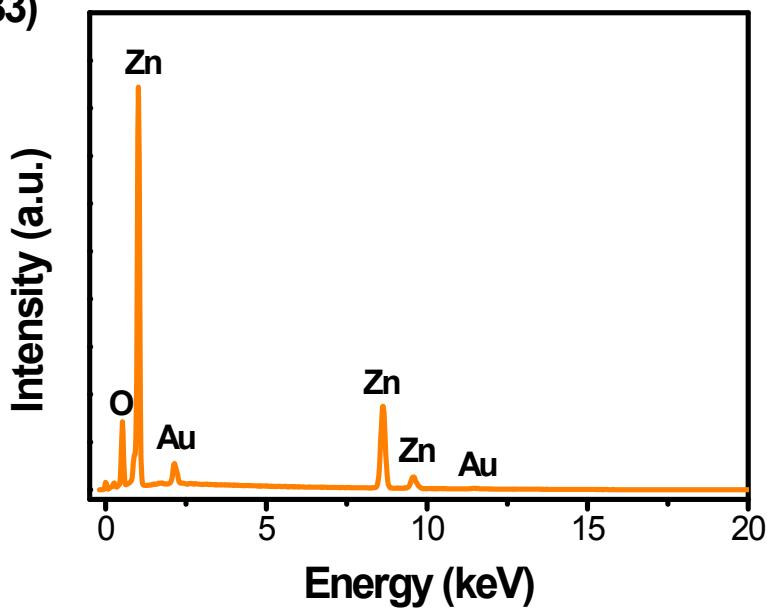

(C)

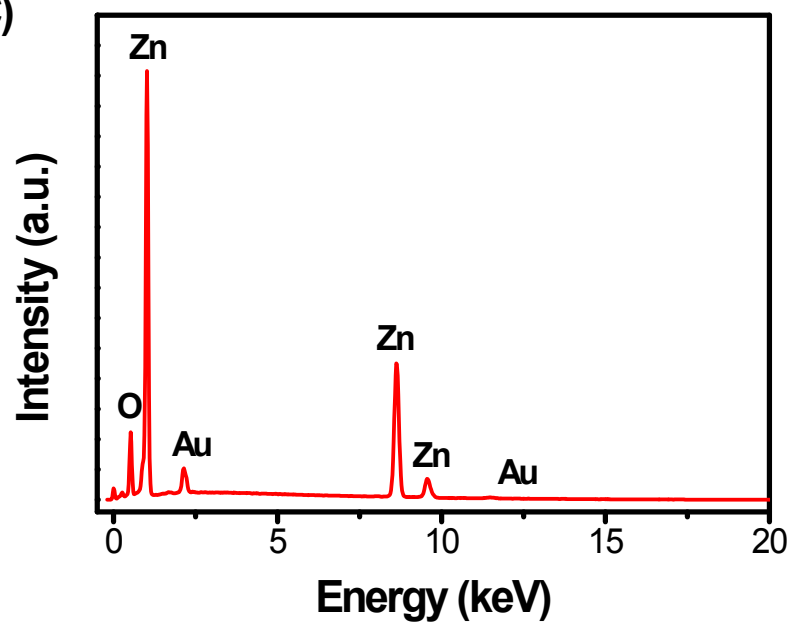

ESI-Fig. II: BET Plots of (A) BZ150, (B) BZ550, (C) BZ850.

(A)

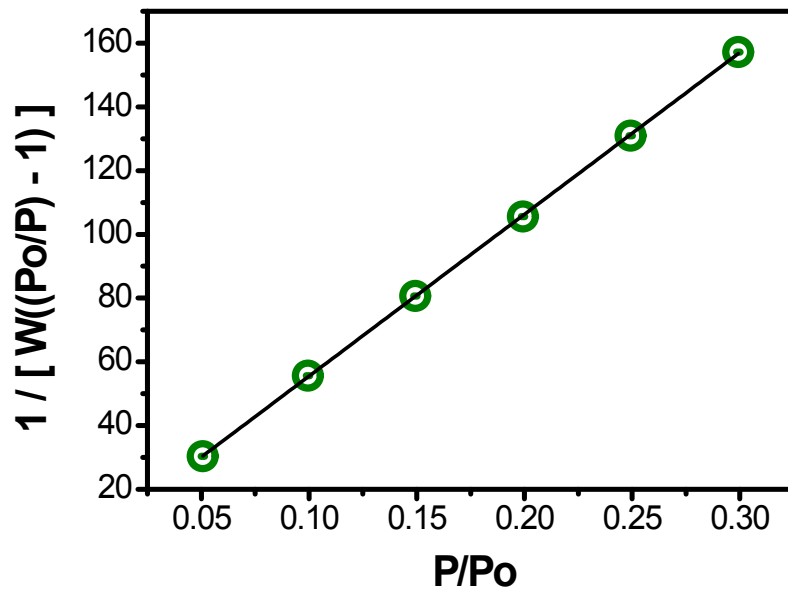

(B)

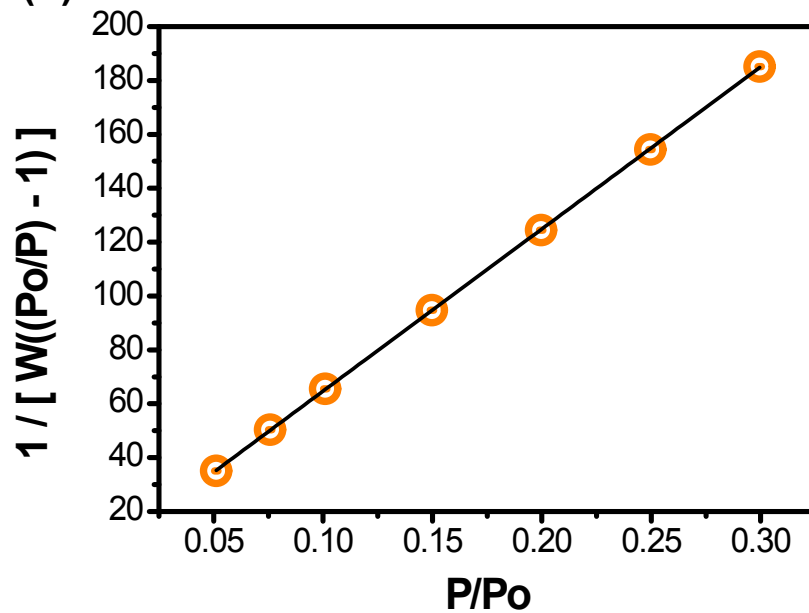

(c)

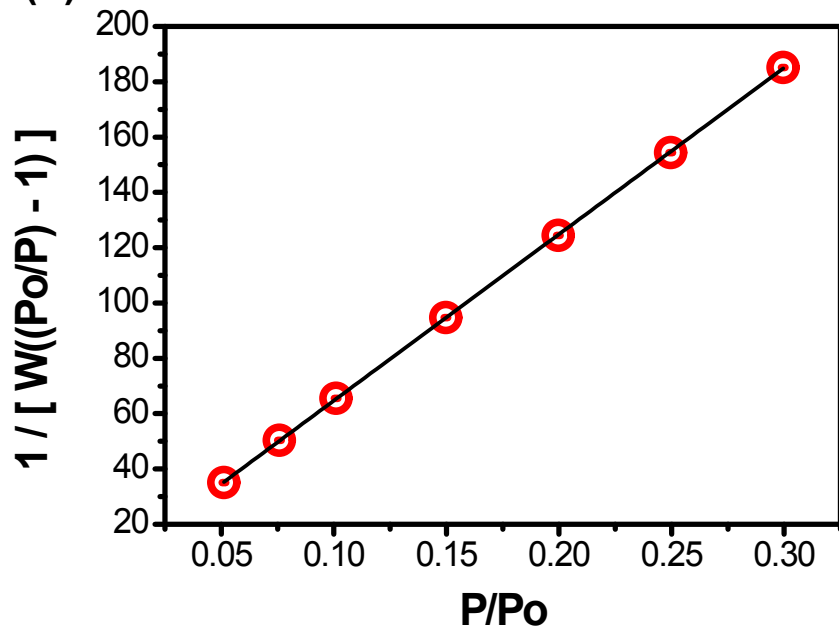

Supplement: d0ra04766j1.pdf [file d0ra04766j1.pdf]
